# Supplementary material
Source: PubMed Central journal article supplement (PMC2879801)
Supplement: pp.110.155838_1.pdf [file pp.110.155838_1.pdf]

**Table S1. List of genes misregulated in the *php-2* mutant**

| AGI Gene  | Fold change (Log2; php-2/wild-type) | P value for fold change | Gene description                                                                                                                             |
|-----------|-------------------------------------|-------------------------|----------------------------------------------------------------------------------------------------------------------------------------------|
| At4g16590 | 3.87                                | 3.9E-03                 | "ATCSLA01 (Cellulose synthase-like A1); glucosyltransferase/ transferase, transferring glycosyl groups"                                      |
| At1g54020 | 3.68                                | 9.6E-03                 | "myrosinase-associated protein, putative"                                                                                                    |
| At2g45660 | 3.08                                | 5.3E-05                 | AGL20 (AGAMOUS-LIKE 20); transcription factor                                                                                                |
| At4g14130 | 2.80                                | 7.1E-03                 | "XTR7 (XYLOGLUCAN ENDOTRANGLYCOSYLASE 7); hydrolase, acting on glycosyl bonds"                                                               |
| At1g20390 | 2.65                                | 5.5E-04                 | transposable element gene                                                                                                                    |
| At4g35770 | 2.16                                | 6.2E-03                 | SEN1 (DARK INDUCIBLE 1)                                                                                                                      |
| At5g26270 | 2.05                                | 9.5E-04                 | unknown protein                                                                                                                              |
| At3g53250 | 1.96                                | 9.7E-03                 | auxin-responsive family protein                                                                                                              |
| At1g09350 | 1.84                                | 2.8E-03                 | "ATGOLS3 (ARABIDOPSIS THALIANA GALACTINOL SYNTHASE 3); transferase, transferring glycosyl groups / transferase, transferring hexosyl groups" |
| At3g28500 | 1.77                                | 1.6E-04                 | 60S acidic ribosomal protein P2 (RPP2C)                                                                                                      |
| At1g62540 | 1.73                                | 6.8E-03                 | flavin-containing monooxygenase family protein / FMO family protein                                                                          |
| At5g52310 | 1.70                                | 1.1E-03                 | COR78 (COLD REGULATED 78)                                                                                                                    |
| At5g09440 | 1.65                                | 5.5E-03                 | "phosphate-responsive protein, putative"                                                                                                     |
| At1g51090 | 1.53                                | 1.9E-03                 | heavy-metal-associated domain-containing protein                                                                                             |
| At3g26460 | 1.49                                | 1.4E-04                 | major latex protein-related / MLP-related                                                                                                    |
| At4g23680 | 1.44                                | 1.4E-03                 | major latex protein-related / MLP-related                                                                                                    |
| At1g65310 | 1.43                                | 8.2E-03                 | "ATXTH17 (XYLOGLUCAN ENDOTRANGLUCOSYLASE/HYDROLASE 17); hydrolase, acting on glycosyl bonds"                                                 |
| At3g14395 | 1.40                                | 1.5E-03                 | unknown protein                                                                                                                              |
| At2g47880 | 1.35                                | 5.8E-03                 | glutaredoxin family protein                                                                                                                  |
| At2g42760 | 1.32                                | 7.8E-03                 |                                                                                                                                              |
| At1g70270 | 1.31                                | 3.9E-04                 | unknown protein                                                                                                                              |
| At4g10390 | 1.28                                | 8.4E-03                 | protein kinase family protein                                                                                                                |
| At1g09530 | 1.20                                | 7.9E-03                 | PAP3/PIF3/POC1 (PHYTOCHROME INTERACTING FACTOR 3); DNA binding / protein binding / transcription factor/ transcription regulator             |
| At1g29395 | 1.18                                | 5.3E-04                 | COR414-TM1 (cold regulated 414 thylakoid membrane 1)                                                                                         |
| At5g57550 | 1.18                                | 5.8E-03                 | "XTR3 (XYLOGLUCAN ENDOTRANGLYCOSYLASE 3); hydrolase, acting on glycosyl bonds"                                                               |
| At2g33830 | 1.17                                | 7.6E-04                 | dormancy/auxin associated family protein                                                                                                     |
| At4g10380 | 1.17                                | 4.2E-03                 | NIP5;1/NLM6/NLM8 (NOD26-like intrinsic protein 5;1); boron transporter/ water channel                                                        |
| At5g10650 | 1.16                                | 2.4E-03                 | zinc finger (C3HC4-type RING finger) family protein                                                                                          |
| At1g12080 | 1.12                                | 5.8E-03                 |                                                                                                                                              |
| At5g62360 | 1.11                                | 8.9E-05                 | invertase/pectin methylesterase inhibitor family protein                                                                                     |
| At1g11080 | 1.11                                | 6.1E-03                 | SCPL31 (serine carboxypeptidase-like 31); serine carboxypeptidase                                                                            |
| At4g33150 | 1.11                                | 1.5E-04                 | LKR (SACCHAROPINE DEHYDROGENASE)                                                                                                             |
| At4g15440 | 1.08                                | 9.7E-03                 | HPL1 (HYDROPEROXIDE LYASE 1); heme binding / iron ion binding / monooxygenase                                                                |
| At4g30270 | 1.07                                | 4.0E-03                 | "MERI5B (MERISTEM-5); hydrolase, acting on glycosyl bonds / xyloglucan:xyloglucosyl transferase"                                             |
| At1g22690 | 1.05                                | 3.4E-03                 | "gibberellin-responsive protein, putative"                                                                                                   |
| At1g68600 | 1.04                                | 2.2E-03                 |                                                                                                                                              |
| At1g52190 | 1.03                                | 7.6E-03                 | proton-dependent oligopeptide transport (POT) family protein                                                                                 |
| At1g27590 | 1.02                                | 2.7E-03                 |                                                                                                                                              |
| At4g12430 | -1.02                               | 1.9E-03                 | "trehalose-6-phosphate phosphatase, putative"                                                                                                |

|           |       |         |                                                                                                                                            |
|-----------|-------|---------|--------------------------------------------------------------------------------------------------------------------------------------------|
| At5g59330 | -1.03 | 1.4E-04 |                                                                                                                                            |
| At2g43590 | -1.04 | 2.2E-04 | "chitinase, putative"                                                                                                                      |
| At4g24050 | -1.04 | 5.9E-03 | short-chain dehydrogenase/reductase (SDR) family protein                                                                                   |
| At1g69526 | -1.07 | 6.4E-04 | UbiE/COQ5 methyltransferase family protein                                                                                                 |
| At4g01870 | -1.08 | 6.4E-03 | tolB protein-related                                                                                                                       |
| At4g21610 | -1.08 | 1.5E-03 | LOL2 (LSD ONE LIKE 2); transcription factor                                                                                                |
| At1g17050 | -1.08 | 1.8E-04 | SPS2 (SOLANESYL DIPHOSPHATE SYNTHASE 2); dimethylallyltranstransferase/ trans-octaprenyltranstransferase                                   |
| At3g25740 | -1.10 | 9.8E-03 | MAP1B (METHIONINE AMINOPEPTIDASE 1C); metalloexopeptidase                                                                                  |
| At2g40300 | -1.12 | 2.1E-04 | ATFER4 (FERRITIN 4); ferric iron binding                                                                                                   |
| At1g13650 | -1.16 | 6.9E-04 |                                                                                                                                            |
| At3g16670 | -1.17 | 2.2E-03 |                                                                                                                                            |
| At1g78000 | -1.24 | 2.0E-04 | SULTR1;2 (SULFATE TRANSPORTER 1;2); sulfate transmembrane transporter                                                                      |
| At3g46370 | -1.28 | 3.2E-03 | "leucine-rich repeat protein kinase, putative"                                                                                             |
| At3g60070 | -1.29 | 1.4E-04 | lactose permease-related                                                                                                                   |
| At5g04950 | -1.33 | 2.1E-03 | "nicotianamine synthase, putative"                                                                                                         |
| At5g03350 | -1.33 | 1.1E-04 | legume lectin family protein                                                                                                               |
| At5g07870 | -1.38 | 2.9E-03 | transferase family protein                                                                                                                 |
| At3g05730 | -1.39 | 1.0E-03 |                                                                                                                                            |
| At5g16970 | -1.44 | 2.0E-04 | AT-AER (ALKENAL REDUCTASE); 2-alkenal reductase                                                                                            |
| At1g17190 | -1.56 | 5.4E-04 | ATGSTU26 (Arabidopsis thaliana Glutathione S-transferase (class tau) 26); glutathione transferase                                          |
| At1g76930 | -1.58 | 7.2E-03 | ATEXT4 (EXTENSIN 4)                                                                                                                        |
| At1g01060 | -1.68 | 4.6E-03 | LHY (LATE ELONGATED HYPOCOTYL); DNA binding / transcription factor                                                                         |
| At2g38940 | -1.72 | 6.4E-03 | ATPT2 (PHOSPHATE TRANSPORTER 2); carbohydrate transmembrane transporter/ phosphate transmembrane transporter/ sugar:hydrogen ion symporter |
| At1g65330 | -1.73 | 5.8E-04 | PHE1 (PHERES1); DNA binding / transcription factor                                                                                         |
| At5g45380 | -1.85 | 1.4E-04 | sodium:solute symporter family protein                                                                                                     |
| At2g43570 | -1.86 | 4.4E-03 | "chitinase, putative"                                                                                                                      |
| At1g73260 | -1.98 | 9.6E-04 | trypsin and protease inhibitor family protein / Kunitz family protein                                                                      |
| At5g10140 | -2.01 | 2.3E-04 | FLC (FLOWERING LOCUS C); transcription factor                                                                                              |
| At4g12480 | -2.04 | 1.6E-05 | pEARLI 1; lipid binding                                                                                                                    |
| At4g11650 | -2.06 | 2.7E-03 | ATOSM34 (OSMOTIN 34)                                                                                                                       |
| At3g18250 | -2.14 | 6.2E-04 |                                                                                                                                            |
| At5g08030 | -2.19 | 1.7E-06 | glycerophosphoryl diester phosphodiesterase family protein                                                                                 |
| At5g17890 | -2.28 | 1.6E-03 | LIM domain-containing protein / disease resistance protein-related                                                                         |
| At4g12500 | -2.34 | 3.7E-05 | protease inhibitor/seed storage/lipid transfer protein (LTP) family protein                                                                |
| At4g12490 | -2.89 | 5.7E-05 | protease inhibitor/seed storage/lipid transfer protein (LTP) family protein                                                                |
| At3g22590 | -3.03 | 6.1E-04 | RNA pol II accessory factor Cdc73 family protein                                                                                           |



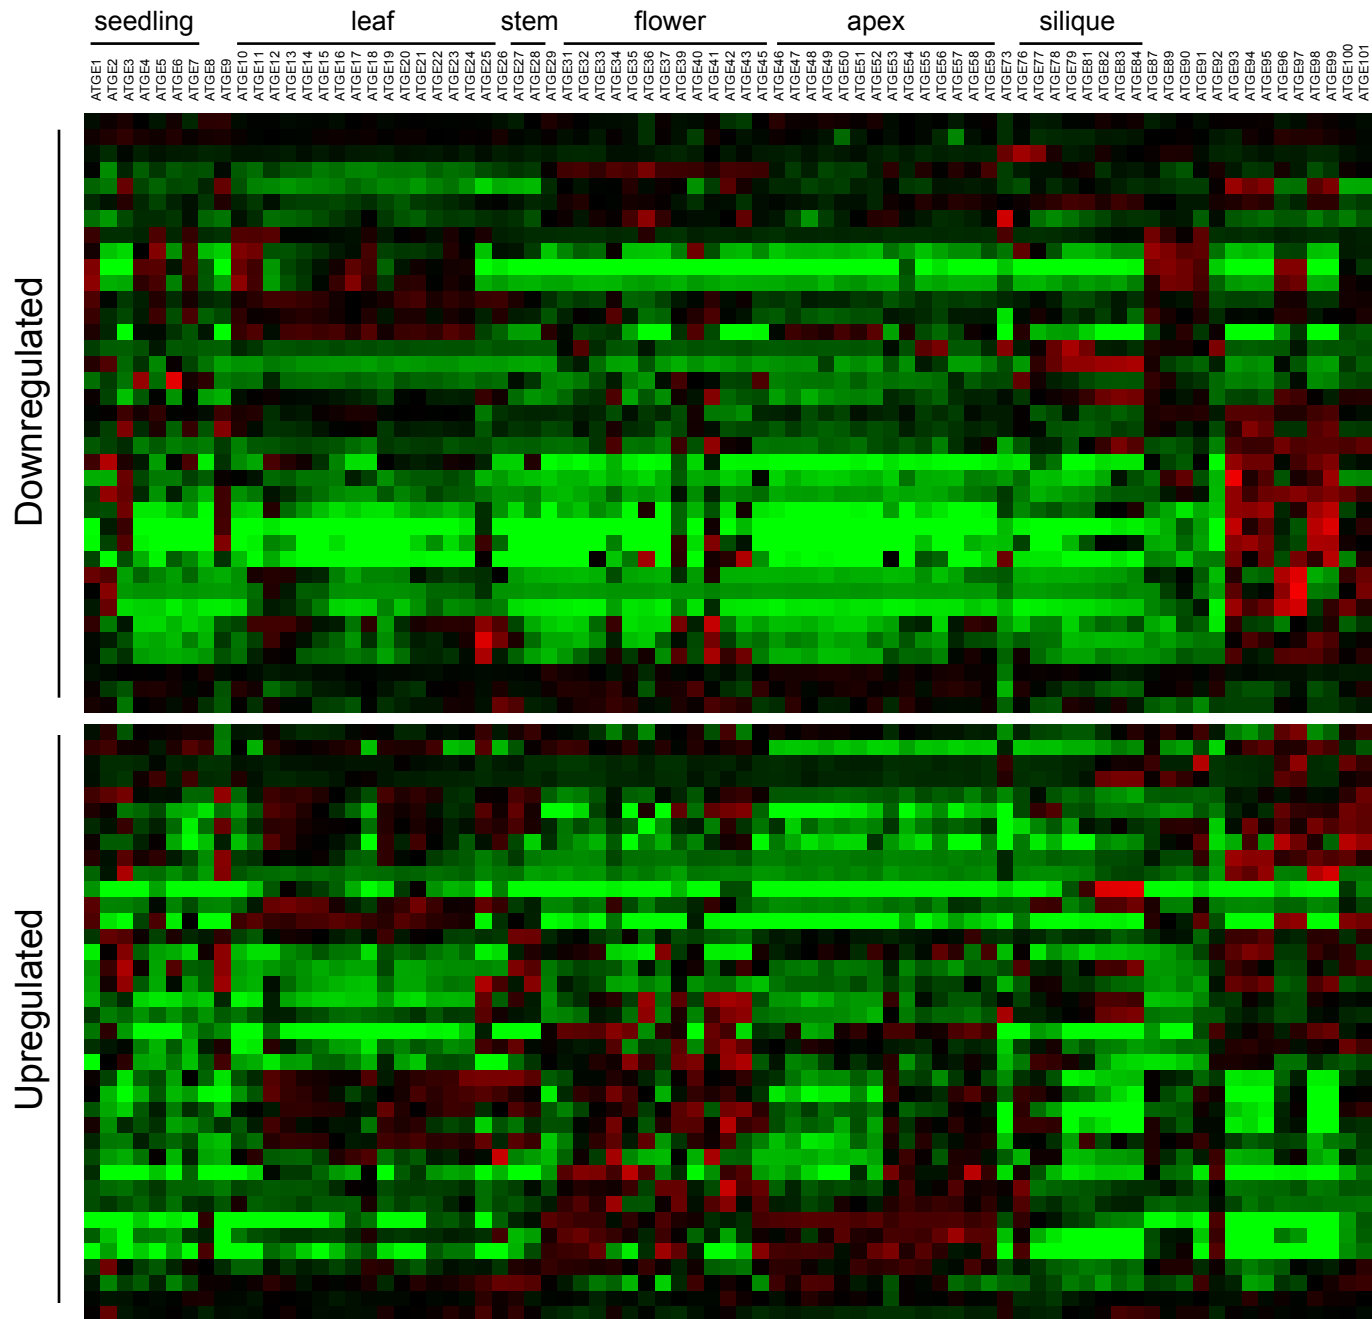

**FIG. S2. Developmental regulation of PHP-targeted genes.**
